# Supplementary material for: BRDT promotes ovarian cancer cell growth
Source: PubMed Central journal article supplement (PMC7705741; doi:10.1038/s41419-020-03225-y), 2020-11-30
Supplement: 41419_2020_3225_MOESM1_ESM.pdf [file 41419_2020_3225_MOESM1_ESM.pdf]

**Figure S1**

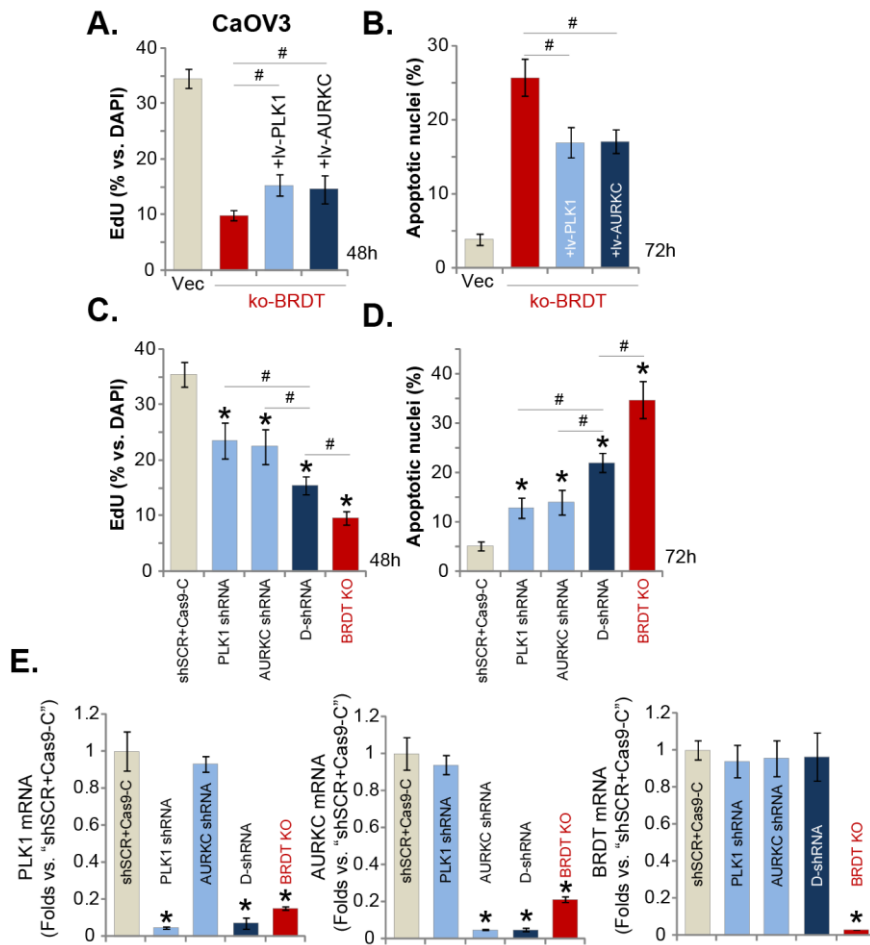

**Figure S1.** CaOV3 cells expressing the CRISPR/Cas9-BRDT-KO construct (with “sgRNA-1”, “ko-BRDT” cells) were further transfected with PLK1-expressing lentivirus (“+lv-PLK1”) or AURKC-expressing lentivirus (“+lv-AURKC”), stable cells were established. Control cells were with empty vector (“Vec”); Cells were further cultured for applied time periods, cell proliferation (EdU assays, **A**) and apoptosis (**B**) were tested. CaOV3 cells were transfected with PLK1 shRNA lentivirus (“PLK1-shRNA”), AURKC shRNA lentivirus (“AURKC-shRNA”) or both (“D-shRNA”) for 24h, stable cells were selected by puromycin. These cells, the “ko-BRDT” cells and control cells with scramble control shRNA plus Cas9-C empty vector (“shSCR+Cas9-C”) were cultured for applied time periods, cell proliferation (EdU assays, **C**) and apoptosis (**D**) were tested. Expression of listed mRNAs was shown (**E**). For each assay, n=5 (five dishes or wells). \* $P < 0.05$  vs. “shSCR+Cas9-C” cells (**C-E**). # $P < 0.05$ . Experiments in this figure were repeated three times, with similar results obtained.
